# Supplementary material for: Responses to severe weather warnings and affective decision-making
Source: Copernicus journal article supplement (doi:10.5194/nhess-20-2811-2020), 2020-10-26
Supplement: Supplementary file 1 [file nhess-20-2811-2020-supplement.pdf]

Supplement of Nat. Hazards Earth Syst. Sci., 20, 2811–2821, 2020  
<https://doi.org/10.5194/nhess-20-2811-2020-supplement>  
© Author(s) 2020. This work is distributed under  
the Creative Commons Attribution 4.0 License.

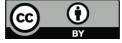

*Supplement of*

## **Responses to severe weather warnings and affective decision-making**

**Philippe Weyrich et al.**

*Correspondence to:* Philippe Weyrich ([philippe.weyrich@usys.ethz.ch](mailto:philippe.weyrich@usys.ethz.ch))

The copyright of individual parts of the supplement might differ from the CC BY 4.0 License.

**Questionnaire.**

1. Did you receive the warning via push message?

|                          |                          |
|--------------------------|--------------------------|
| Yes                      | No                       |
| <input type="checkbox"/> | <input type="checkbox"/> |

2. Have you looked at the wind warning above the survey link?

|                          |                          |
|--------------------------|--------------------------|
| Yes                      | No                       |
| <input type="checkbox"/> | <input type="checkbox"/> |

Continue only if yes.

3. What feelings did the warning trigger? Please indicate to what extent the following statements apply to you or do not apply.

|                  | <i>Strongly disagree</i> | <i>Disagree</i>          | <i>Neither</i>           | <i>Agree</i>             | <i>Strongly agree</i>    |
|------------------|--------------------------|--------------------------|--------------------------|--------------------------|--------------------------|
| I was relaxed.   | <input type="checkbox"/> |
| I was scared.    | <input type="checkbox"/> |
| I was worried.   | <input type="checkbox"/> |
| I was reassured. | <input type="checkbox"/> |
| I was angry.     | <input type="checkbox"/> |

4. How do you find the information in this warning?

|                                                                                       | <i>Strongly disagree</i> | <i>Disagree</i>          | <i>Neither</i>           | <i>Agree</i>             | <i>Strongly agree</i>    |
|---------------------------------------------------------------------------------------|--------------------------|--------------------------|--------------------------|--------------------------|--------------------------|
| The warning is clear and easy to understand.                                          | <input type="checkbox"/> |
| I believe the message to be credible.                                                 | <input type="checkbox"/> |
| The warning makes me concerned for my safety.                                         | <input type="checkbox"/> |
| Based on the warning I understand the threats to my safety.                           | <input type="checkbox"/> |
| Based on the warning it is clear to me how I should modify my behavior, if necessary. | <input type="checkbox"/> |

5. Does the weather described in the warning pose a risk to you

|                          |                          |
|--------------------------|--------------------------|
| Yes                      | No                       |
| <input type="checkbox"/> | <input type="checkbox"/> |

6. Does the weather described in the warning affect you in your normal duties\*?

|                          |                          |
|--------------------------|--------------------------|
| Yes                      | No                       |
| <input type="checkbox"/> | <input type="checkbox"/> |

\*(Any examples of usual activities: work, leisure, commute, shopping and other daily activities, etc.)

7. Have you already responded to the warning?

|                          |                          |
|--------------------------|--------------------------|
| Yes                      | No                       |
| <input type="checkbox"/> | <input type="checkbox"/> |

If yes

6A. How did you react to the warning? Which of the following describes best what you did?

|                                                                 |                                                                                                                             |
|-----------------------------------------------------------------|-----------------------------------------------------------------------------------------------------------------------------|
| Adapting:<br>I have adapted, but continued with my activity(s). | Protecting:<br>I have canceled, or postponed my activity(s) or even taken countermeasures* to protect myself or my property |
| <input type="checkbox"/>                                        | <input type="checkbox"/>                                                                                                    |

\* (Any countermeasures to protect his/her property: keep the car in the garage, secure loose items around the house, etc.)

If no.

6B. Are you still planning to respond to the warning? Which of the following statements describes best your action-taking?

|                                                                                            |                                                                        |                                                                                                                                |
|--------------------------------------------------------------------------------------------|------------------------------------------------------------------------|--------------------------------------------------------------------------------------------------------------------------------|
| Nothing/No:<br>I have looked at the warning, but I will continue my activity (s) as usual. | Adapting:<br>I will adapt my activity (s) soon, but continue to do so. | Protecting:<br>I will cancel or postpone my activity (s) soon or even take countermeasures * to protect myself or my property. |
| <input type="checkbox"/>                                                                   | <input type="checkbox"/>                                               | <input type="checkbox"/>                                                                                                       |

\* (Any countermeasures to protect his/her property: keep the car in the garage, secure loose items around the house, etc.)

If no.

6C. Why did not you respond to the warning? Which of the following statements best describes the reason for your inaction?

|                                     |                                         |                                                                                                         |                                                                           |                                               |                          |
|-------------------------------------|-----------------------------------------|---------------------------------------------------------------------------------------------------------|---------------------------------------------------------------------------|-----------------------------------------------|--------------------------|
| I believe that it is not necessary. | The warning does not affect me locally. | My preparations for the last severe weather warning are already in place, so I have nothing else to do. | I did not see or hear the bad weather warning in time to change my plans. | It is not possible to change my activity (s). | Other                    |
| <input type="checkbox"/>            | <input type="checkbox"/>                | <input type="checkbox"/>                                                                                | <input type="checkbox"/>                                                  | <input type="checkbox"/>                      | <input type="checkbox"/> |

8. Have you consulted any other sources of information for confirmation or advice (for example, TV, radio, websites, weather apps, etc.).

|                          |                          |
|--------------------------|--------------------------|
| Yes                      | No                       |
| <input type="checkbox"/> | <input type="checkbox"/> |

9. Where did you search?

|                                    |                          |                          |
|------------------------------------|--------------------------|--------------------------|
|                                    | Yes                      | No                       |
| In the app Wetter-Alarm            | <input type="checkbox"/> | <input type="checkbox"/> |
| In another weather app             | <input type="checkbox"/> | <input type="checkbox"/> |
| On websites                        | <input type="checkbox"/> | <input type="checkbox"/> |
| On the radio or TV                 | <input type="checkbox"/> | <input type="checkbox"/> |
| With family, friends or colleagues | <input type="checkbox"/> | <input type="checkbox"/> |

10. Please specify your gender

|        |      |       |
|--------|------|-------|
| Female | Male | Other |
|--------|------|-------|

|                          |                          |                          |
|--------------------------|--------------------------|--------------------------|
| <input type="checkbox"/> | <input type="checkbox"/> | <input type="checkbox"/> |
|--------------------------|--------------------------|--------------------------|

11. Please indicate your age.

|  |
|--|
|  |
|--|

12. Please state your highest educational qualification.

|                      |                          |
|----------------------|--------------------------|
| Compulsory education | <input type="checkbox"/> |
| Apprenticeship       | <input type="checkbox"/> |
| Highschool           | <input type="checkbox"/> |
| University, ETH      | <input type="checkbox"/> |

13. What was the severity level of the warning to which you responded?

|                          |                          |                          |
|--------------------------|--------------------------|--------------------------|
| 1                        | 2                        | 3                        |
| <input type="checkbox"/> | <input type="checkbox"/> | <input type="checkbox"/> |

14. Have you recently participated in a similar survey on Wetter-Alarm to evaluate a warning?

|                          |                          |
|--------------------------|--------------------------|
| Yes                      | No                       |
| <input type="checkbox"/> | <input type="checkbox"/> |

Do you have any comments / questions?

Thank you for your participation in the study. Your participation helps us to analyze the effectiveness of impact-based warnings compared to standard warnings.
